# Supplementary material
Source: ML conference proceedings conference paper supplement (https://openaccess.thecvf.com/content/CVPR2021/html/Lu_MASA-SR_Matching_Acceleration_CVPR_2021_paper.html)
Supplement: Supplementary file 1 [file Lu_MASA-SR_Matching_Acceleration_CVPR_2021_supplemental.pdf]

# Supplementary Material:

## MASA-SR: Matching Acceleration and Spatial Adaptation for Reference-Based Image Super-Resolution

Liying Lu<sup>1\*</sup> Wenbo Li<sup>1\*</sup> Xin Tao<sup>2</sup> Jiangbo Lu<sup>3</sup> Jiaya Jia<sup>1,3</sup>

<sup>1</sup> The Chinese University of Hong Kong <sup>2</sup> Kuaishou <sup>3</sup> SmartMore

{lylu, wenboli, leojia}@cse.cuhk.edu.hk, jiangsutx@gmail.com, jiangbo@smartmore.com

### 1. Details of Ablation Study

In the ablation study of block sizes and dilation rates, it should be noted that if the size of the LR block is  $m \times n$ , then the basic size of the Ref↓ block is set to  $\frac{mH_{Ref\downarrow}}{H_{LR}} \times \frac{nW_{Ref\downarrow}}{W_{LR}}$ , where  $H_{Ref\downarrow}$ ,  $W_{Ref\downarrow}$  and  $H_{LR}$ ,  $W_{LR}$  are the height and width of the Ref↓ feature and the LR feature, respectively. We multiply the basic size of different scale factors in the ablation study, and use the scale factors to denote the Ref↓ block size in Fig. 5(b) of body text and in the following descriptions.

**Influence of LR block sizes.** The FLOPS in Fig. 5(a) is computed by taking as input a  $192 \times 192$  LR image and a  $768 \times 768$  Ref image. The Ref↓ block size is 1.5 and the dilation is 1.

**Influence of Ref↓ block sizes.** The FLOPS in Fig. 5(b) is computed on a  $128 \times 128$  LR image and a  $512 \times 512$  Ref image. The LR block size is 8 and the dilation is 1.

**Influence of dilation rates.** The FLOPS in Fig. 5(c) is computed on a  $120 \times 120$  LR image and a  $480 \times 480$  Ref image. The LR block size is 12 and the Ref↓ block size is 1.5.

### 2. More Visual Results

We show more visual results of the proposed MASA and other state-of-the-art methods, including RCAN [6], HAN [2], ESRGAN [4], SRNTT [7] and TTSR [5]. RCAN and HAN are SISR methods that have achieved the best performance on PSNR, and ESRGAN is a GAN-based SISR method that is considered state-of-the-art in visual quality. SRNTT [7] and TTSR [5] are state-of-the-art RefSR methods. The visual comparison on CUFED5 [7] testing set are shown in Fig. 1 and Fig. 2, and the comparison on Sun80 [3] and Urban100 [1] are shown in Fig. 3 and Fig. 4, respectively.

It can be observed that our MASA can restore more regular structures and generate photo-realistic details.

### References

- [1] Jia-Bin Huang, Abhishek Singh, and Narendra Ahuja. Single image super-resolution from transformed self-exemplars. In *CVPR*, pages 5197–5206, 2015.
- [2] Ben Niu, Weilei Wen, Wenqi Ren, Xiangde Zhang, Lianping Yang, Shuzhen Wang, Kaihao Zhang, Xiaochun Cao, and Haifeng Shen. Single image super-resolution via a holistic attention network. In *ECCV*, pages 191–207. Springer, 2020.
- [3] Libin Sun and James Hays. Super-resolution from internet-scale scene matching. In *2012 IEEE International Conference on Computational Photography (ICCP)*, pages 1–12. IEEE, 2012.
- [4] Xintao Wang, Ke Yu, Shixiang Wu, Jinjin Gu, Yihao Liu, Chao Dong, Yu Qiao, and Chen Change Loy. Esrgan: Enhanced super-resolution generative adversarial networks. In *ECCV*, pages 0–0, 2018.
- [5] Fuzhi Yang, Huan Yang, Jianlong Fu, Hongtao Lu, and Bain-ing Guo. Learning texture transformer network for image super-resolution. In *CVPR*, pages 5791–5800, 2020.
- [6] Yulun Zhang, Kunpeng Li, Kai Li, Lichen Wang, Bineng Zhong, and Yun Fu. Image super-resolution using very deep residual channel attention networks. In *ECCV*, pages 286–301, 2018.
- [7] Zhifei Zhang, Zhaowen Wang, Zhe Lin, and Hairong Qi. Image super-resolution by neural texture transfer. In *CVPR*, pages 7982–7991, 2019.

---

\*Equal contribution

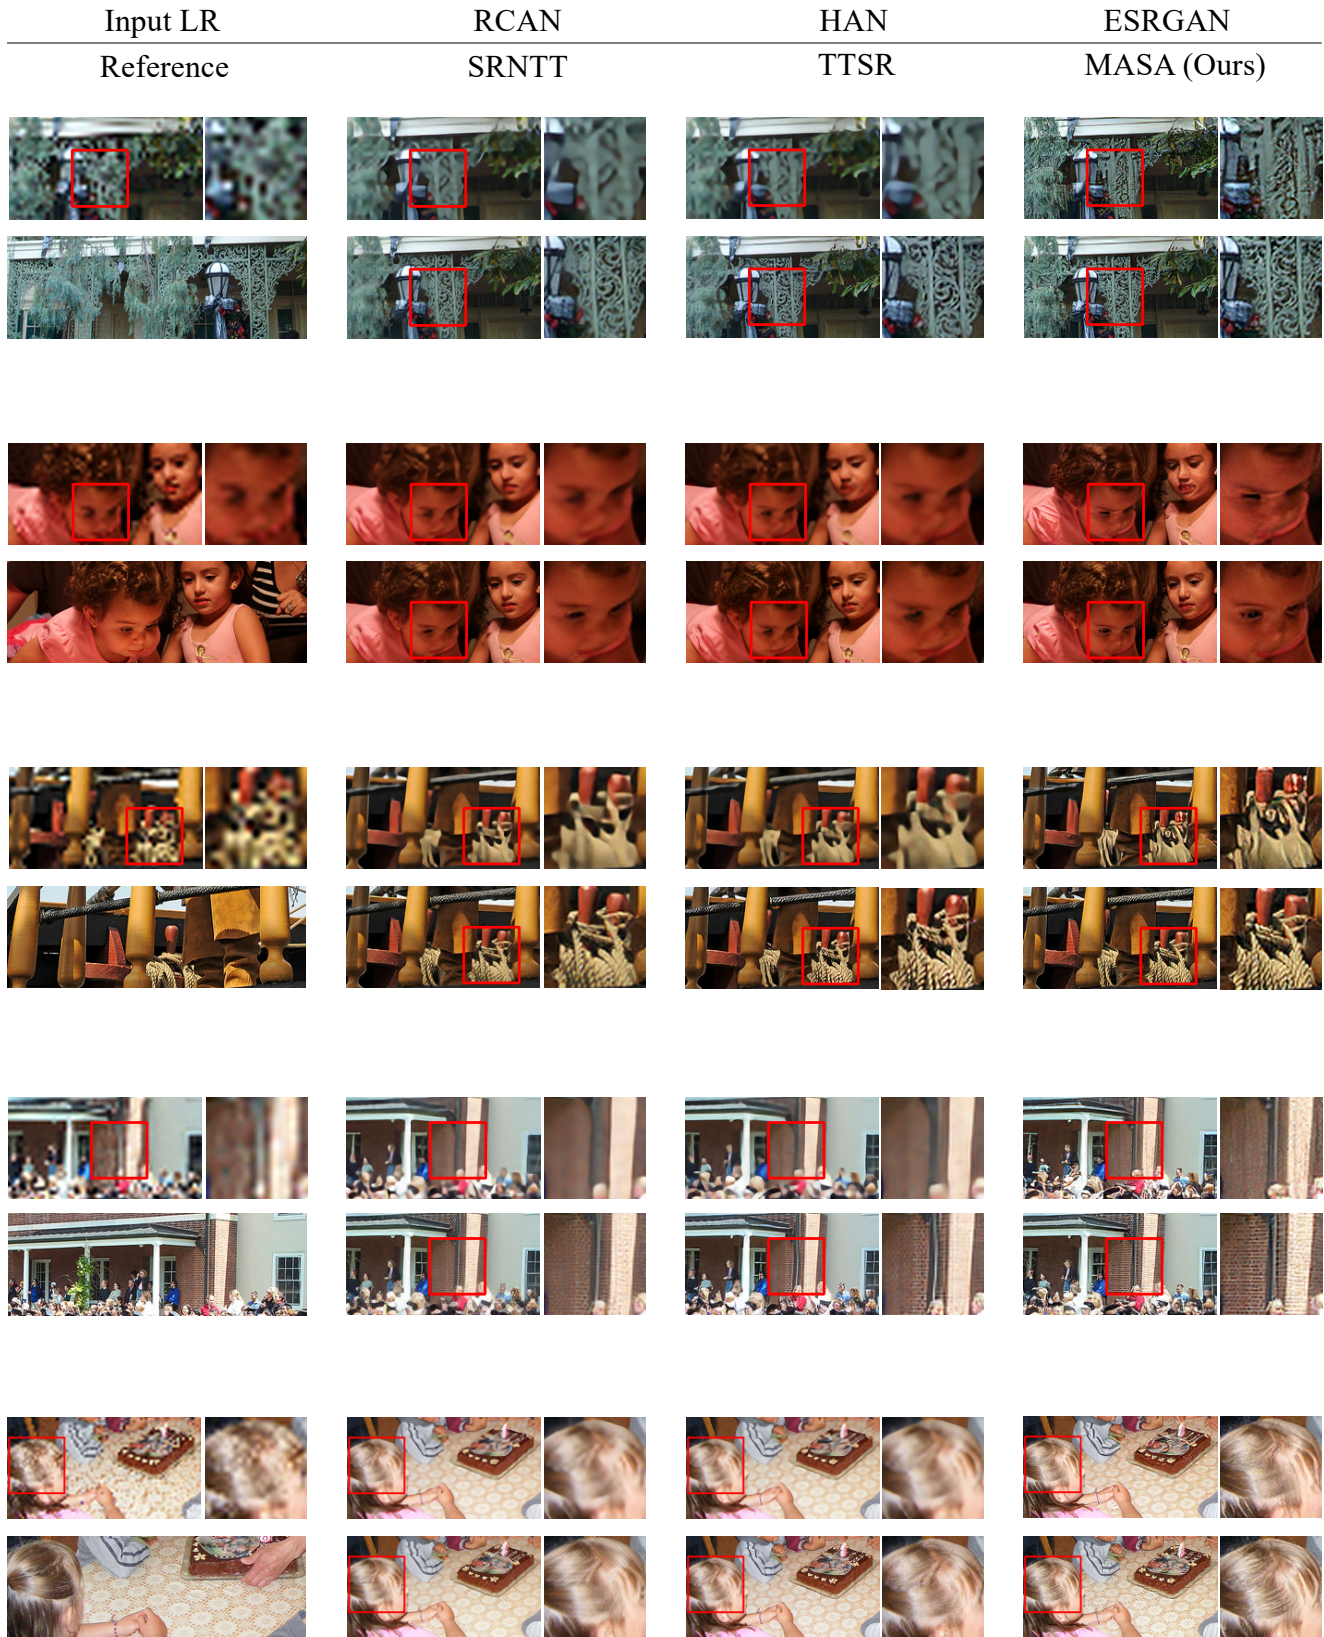

Figure 1: Visual comparison among different SR methods on the CUFED5 [7] testing set.



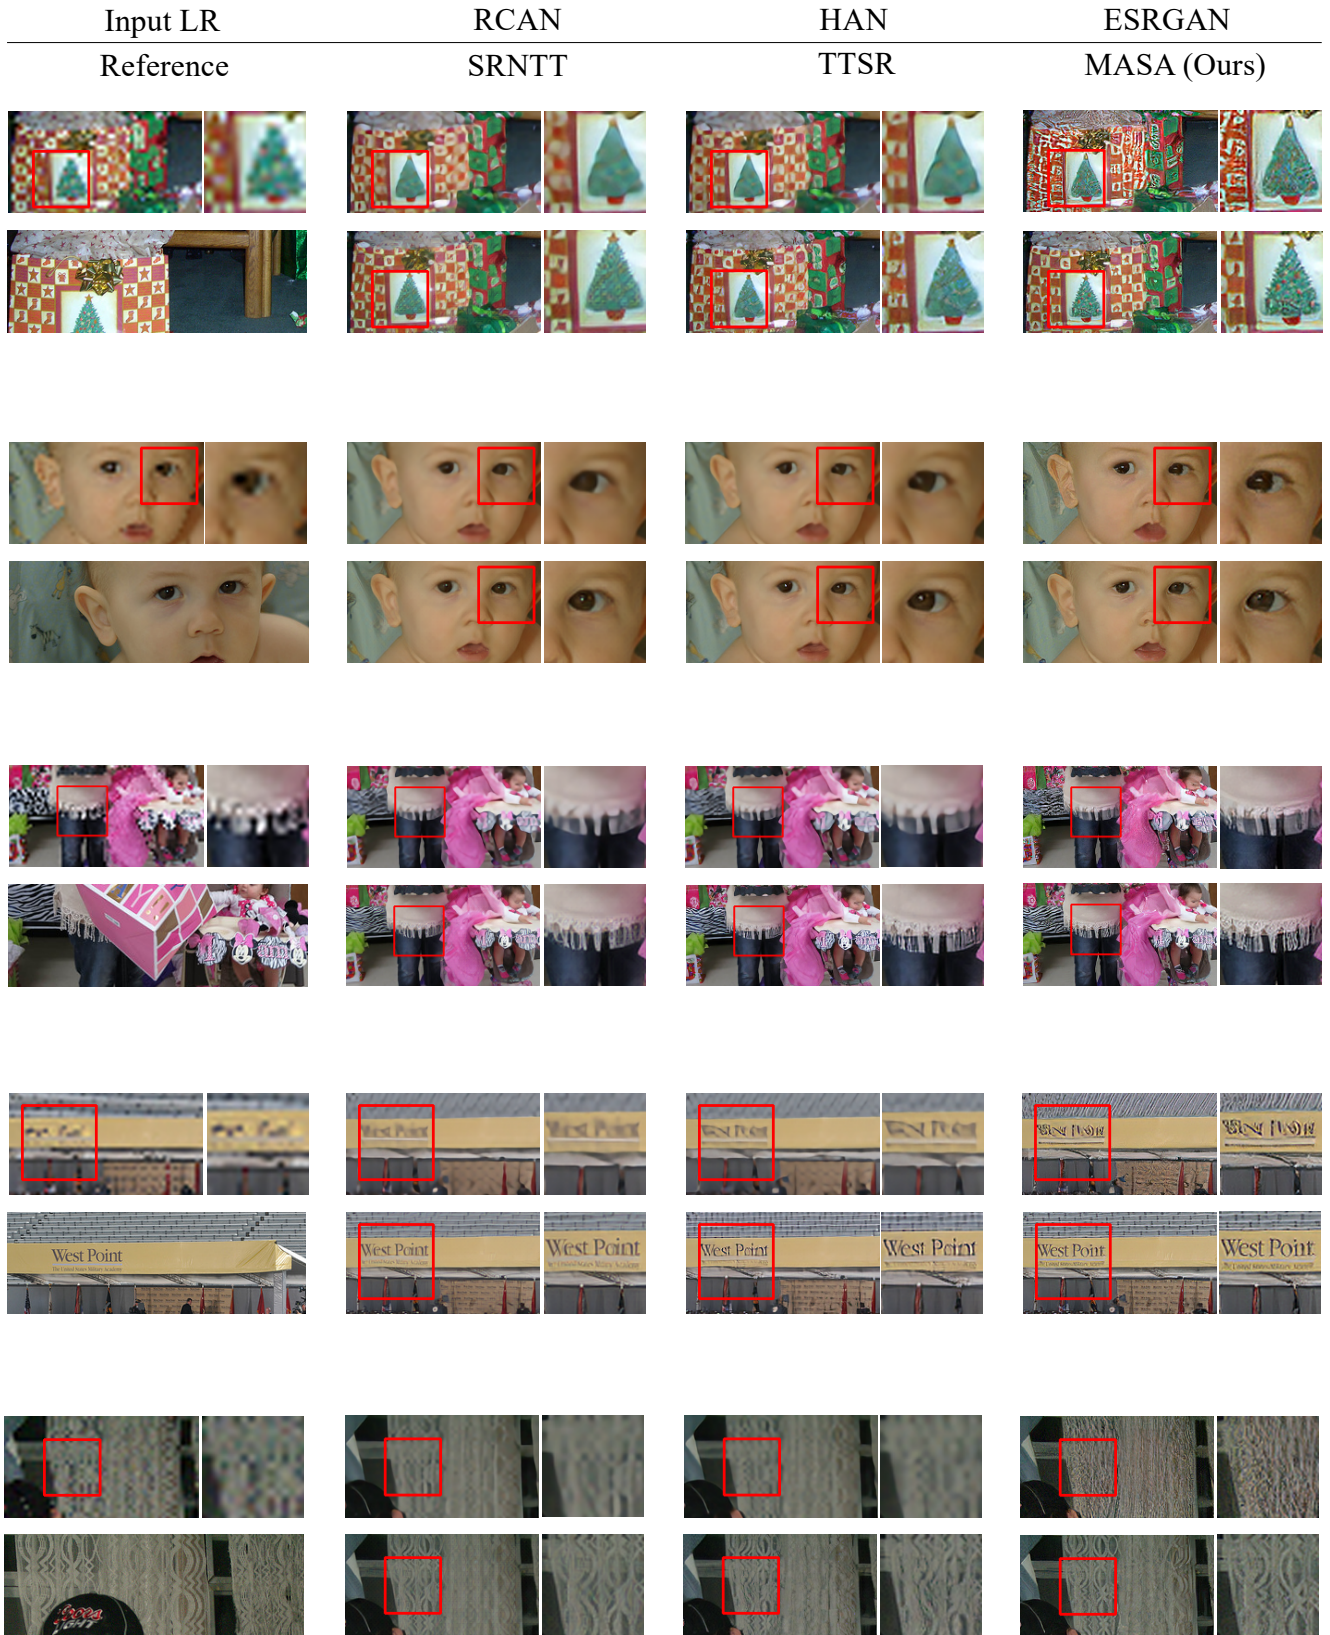

Figure 2: Visual comparison among different SR methods on the CUFED5 [7] testing set.

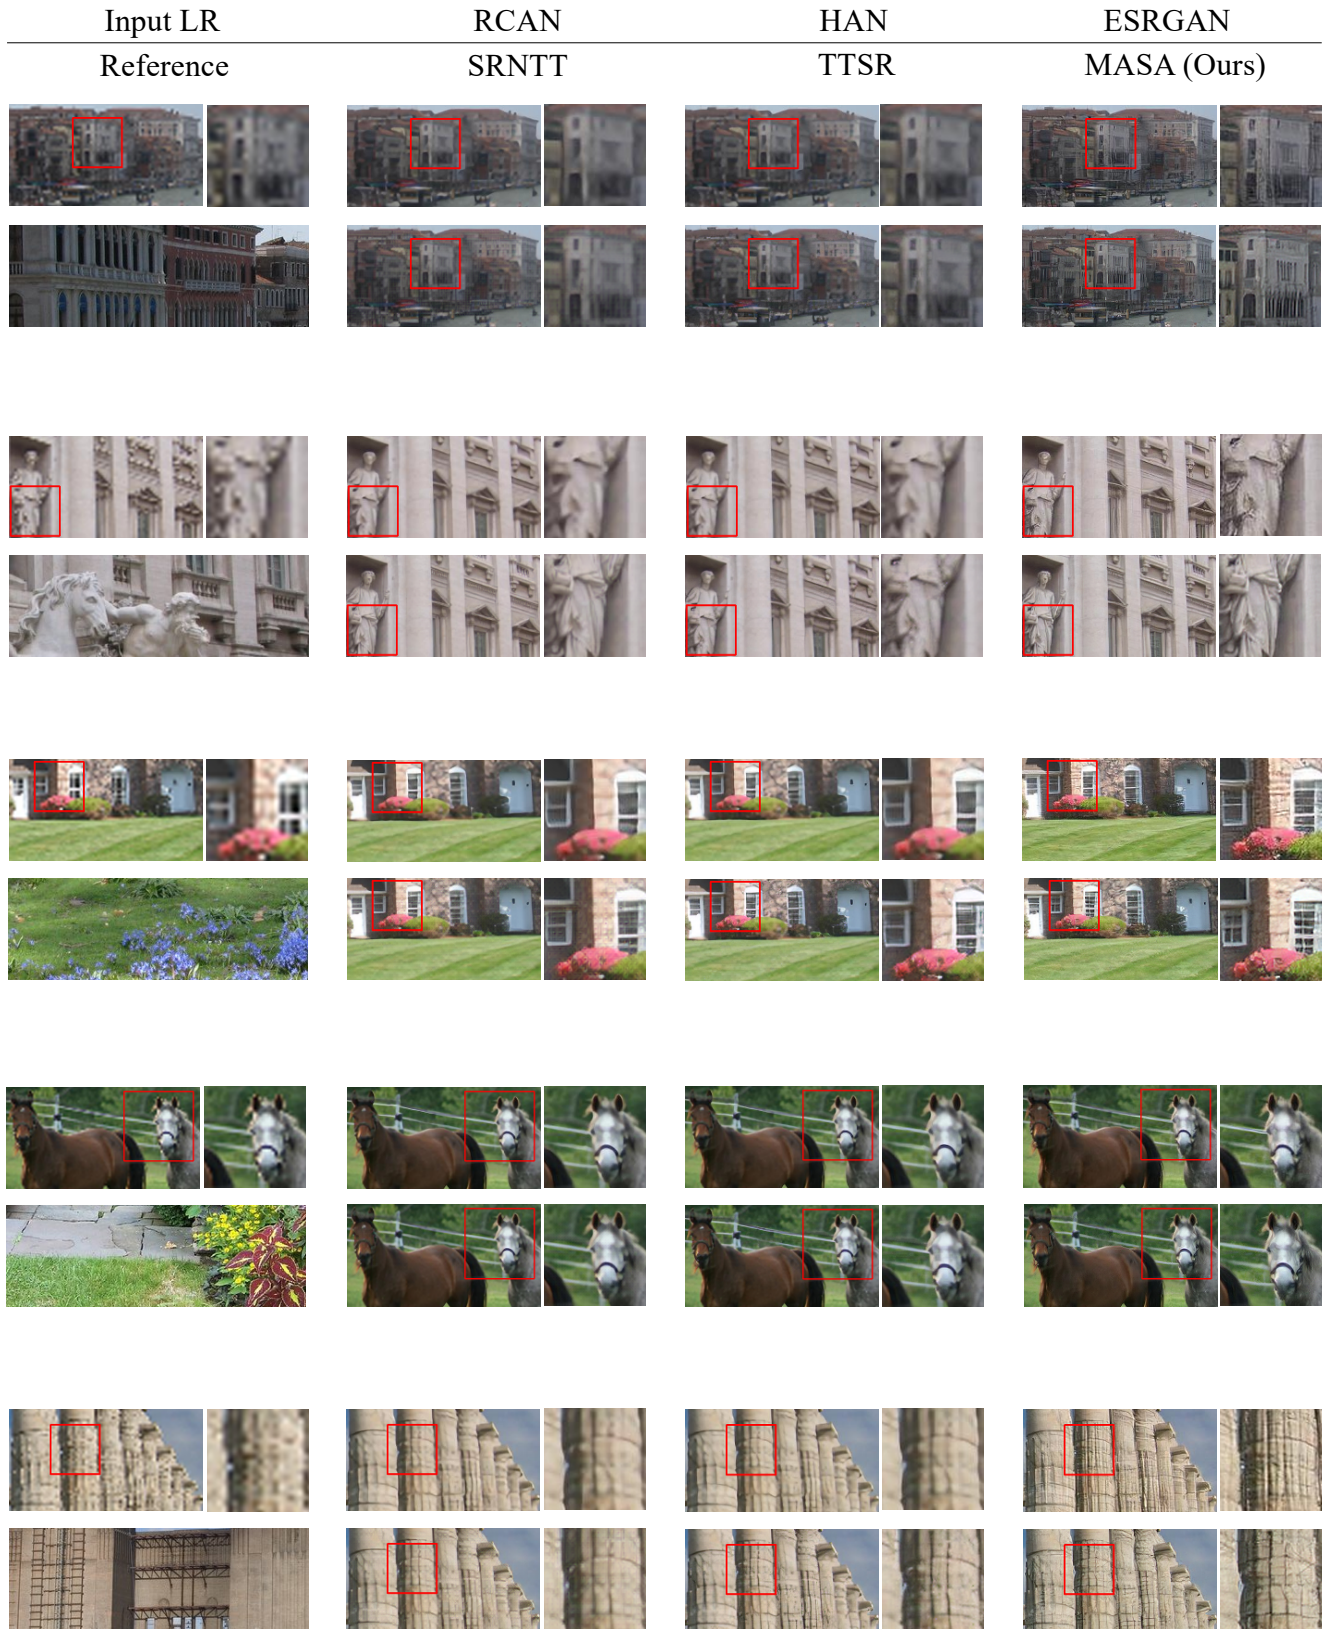

Figure 3: Visual comparison among different SR methods on the Sun80 [3] dataset.



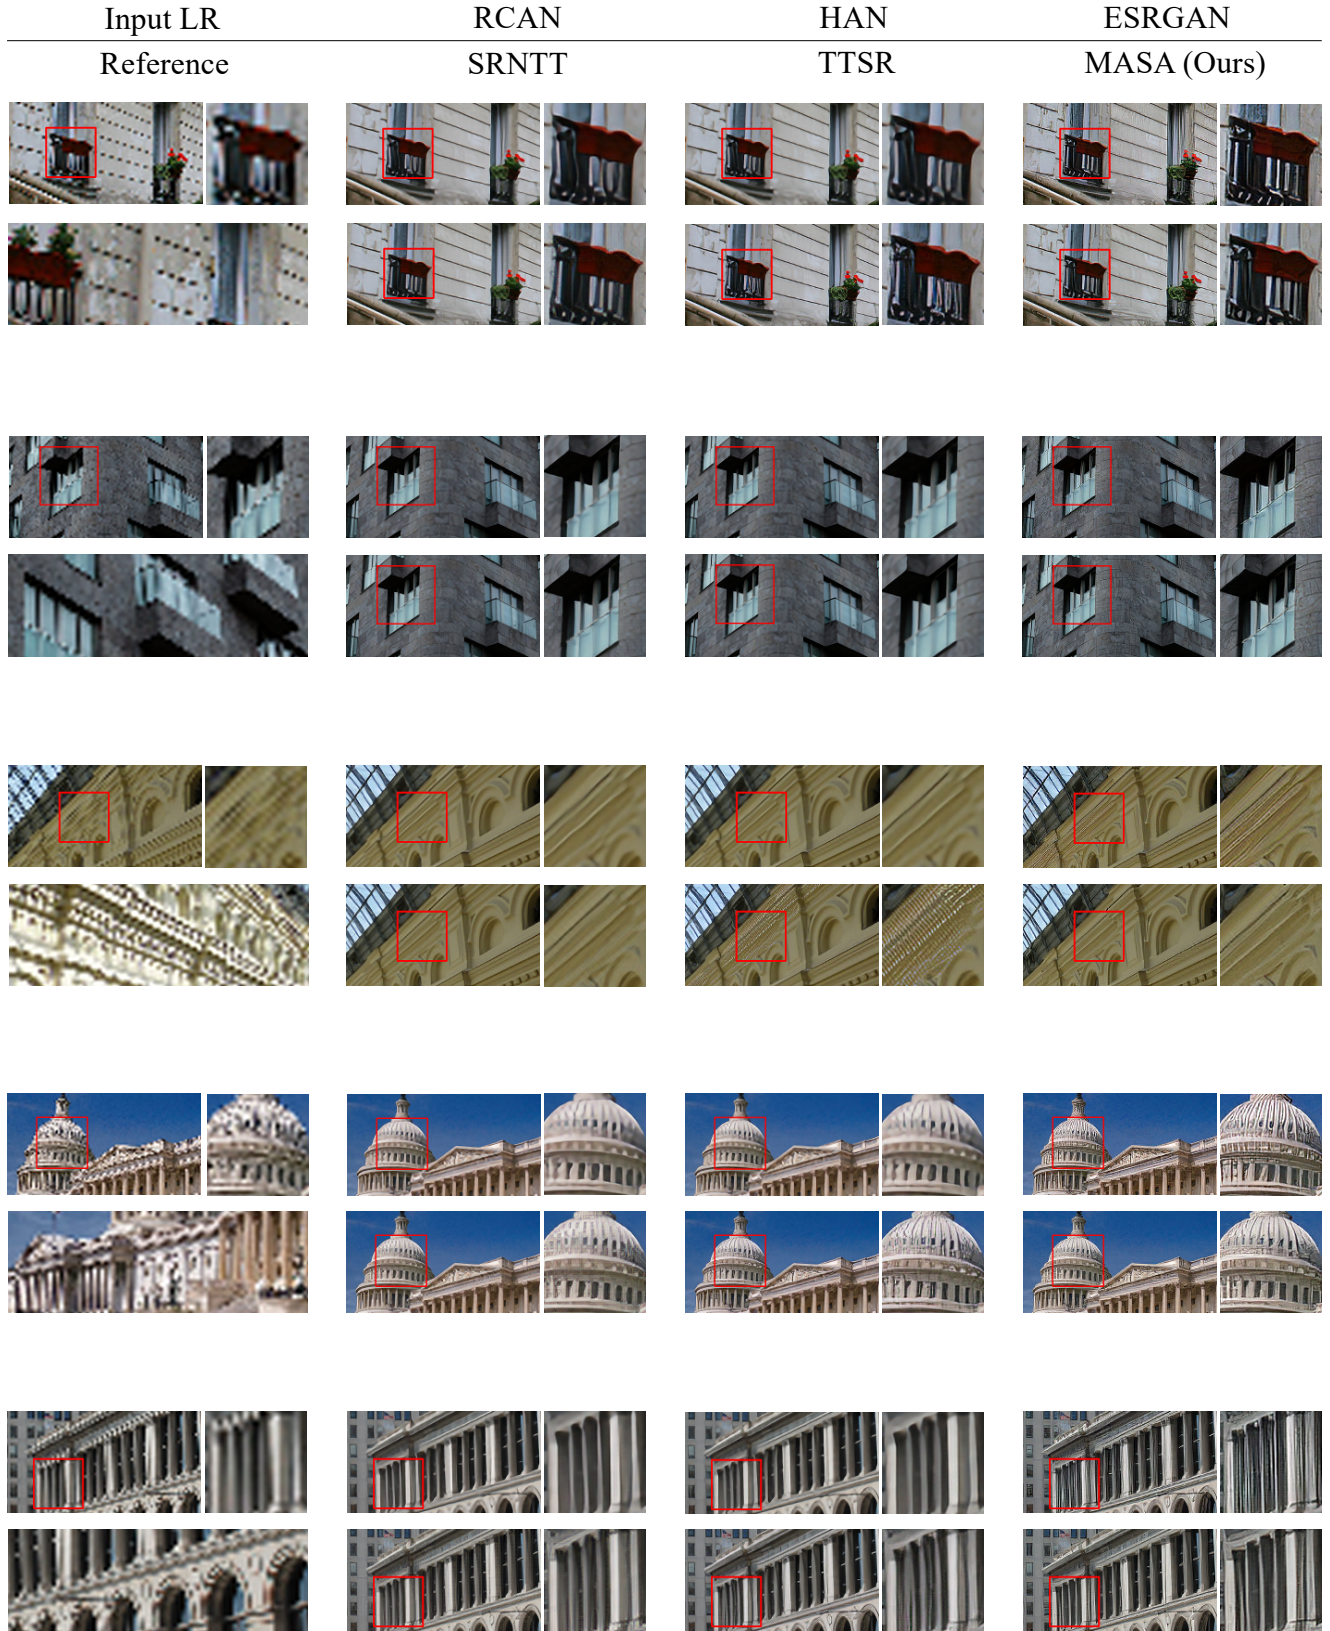

Figure 4: Visual comparison among different SR methods on the Urban100 [1] dataset.
